# Supplementary material
Source: publisher figshare collection journal article supplement (https://gsajournals.figshare.com/articles/dataset/_/12307637)
Supplement: Supplementary file 1 [file 1]

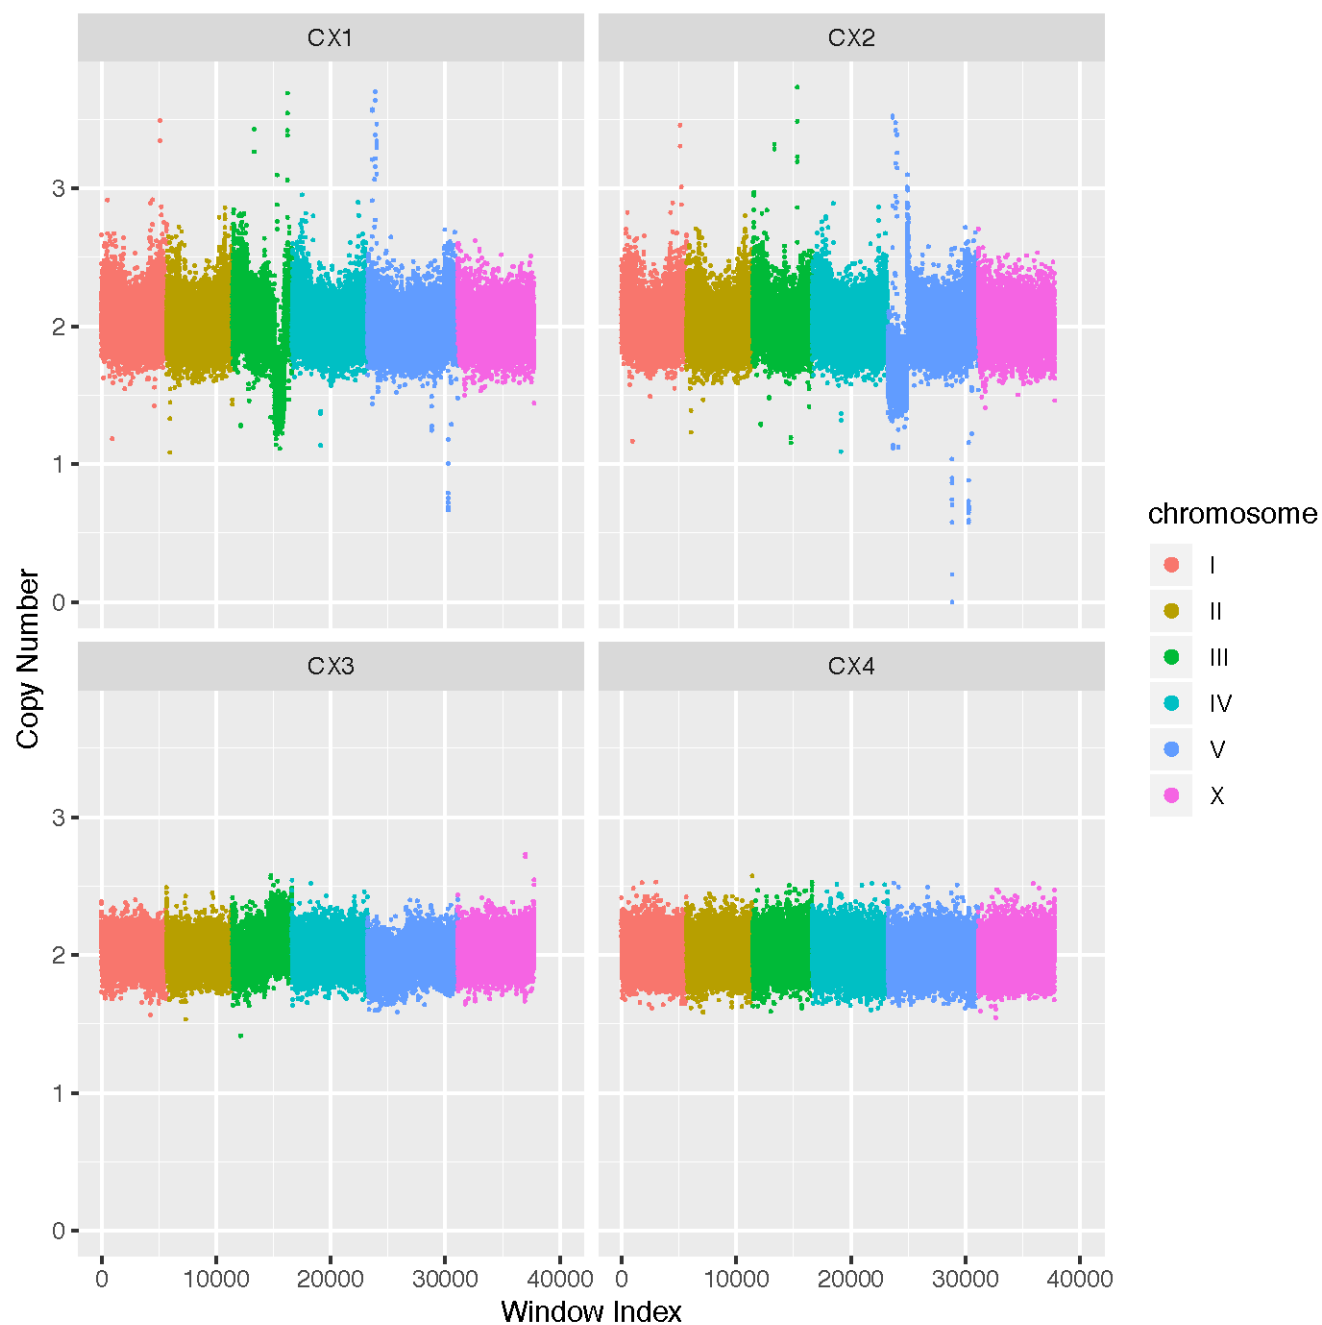

Figure S1. Coverage plot of CX-5461-induced genome rearrangements using 5 kb wide overlapping sliding windows.
