# Supplementary material
Source: publisher figshare collection journal article supplement (https://gsajournals.figshare.com/articles/dataset/_/12307637)
Supplement: Supplementary file 2 [file 1]

|                        | 25°C |   |   |   | 25°C to 75°C |   |   |   |
|------------------------|------|---|---|---|--------------|---|---|---|
| [CX-5461] (30 $\mu$ M) | -    | - | + | + | -            | - | + | + |
| Mung Bean Nuclease     | -    | + | - | + | -            | + | - | + |

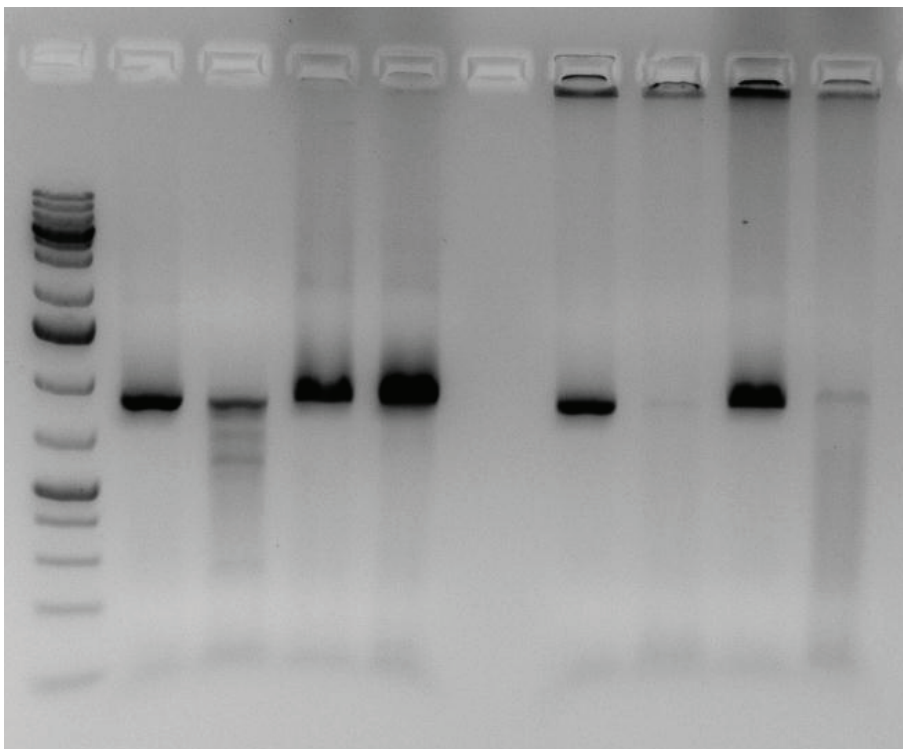

Figure S4. CX-5461 does not inhibit mung bean nuclease. CX-5461 (30  $\mu$ M) stabilizes PCR products at 25°C. MBN degraded DNA in the presence of CX-5461 when the temperature was raised from 25°C to 75°C in 10°C intervals every 5 minutes.
