# Supplementary material
Source: publisher figshare collection journal article supplement (https://gsajournals.figshare.com/articles/dataset/_/12307637)
Supplement: Supplementary file 4 [file 1]

## Distribution of SNVs

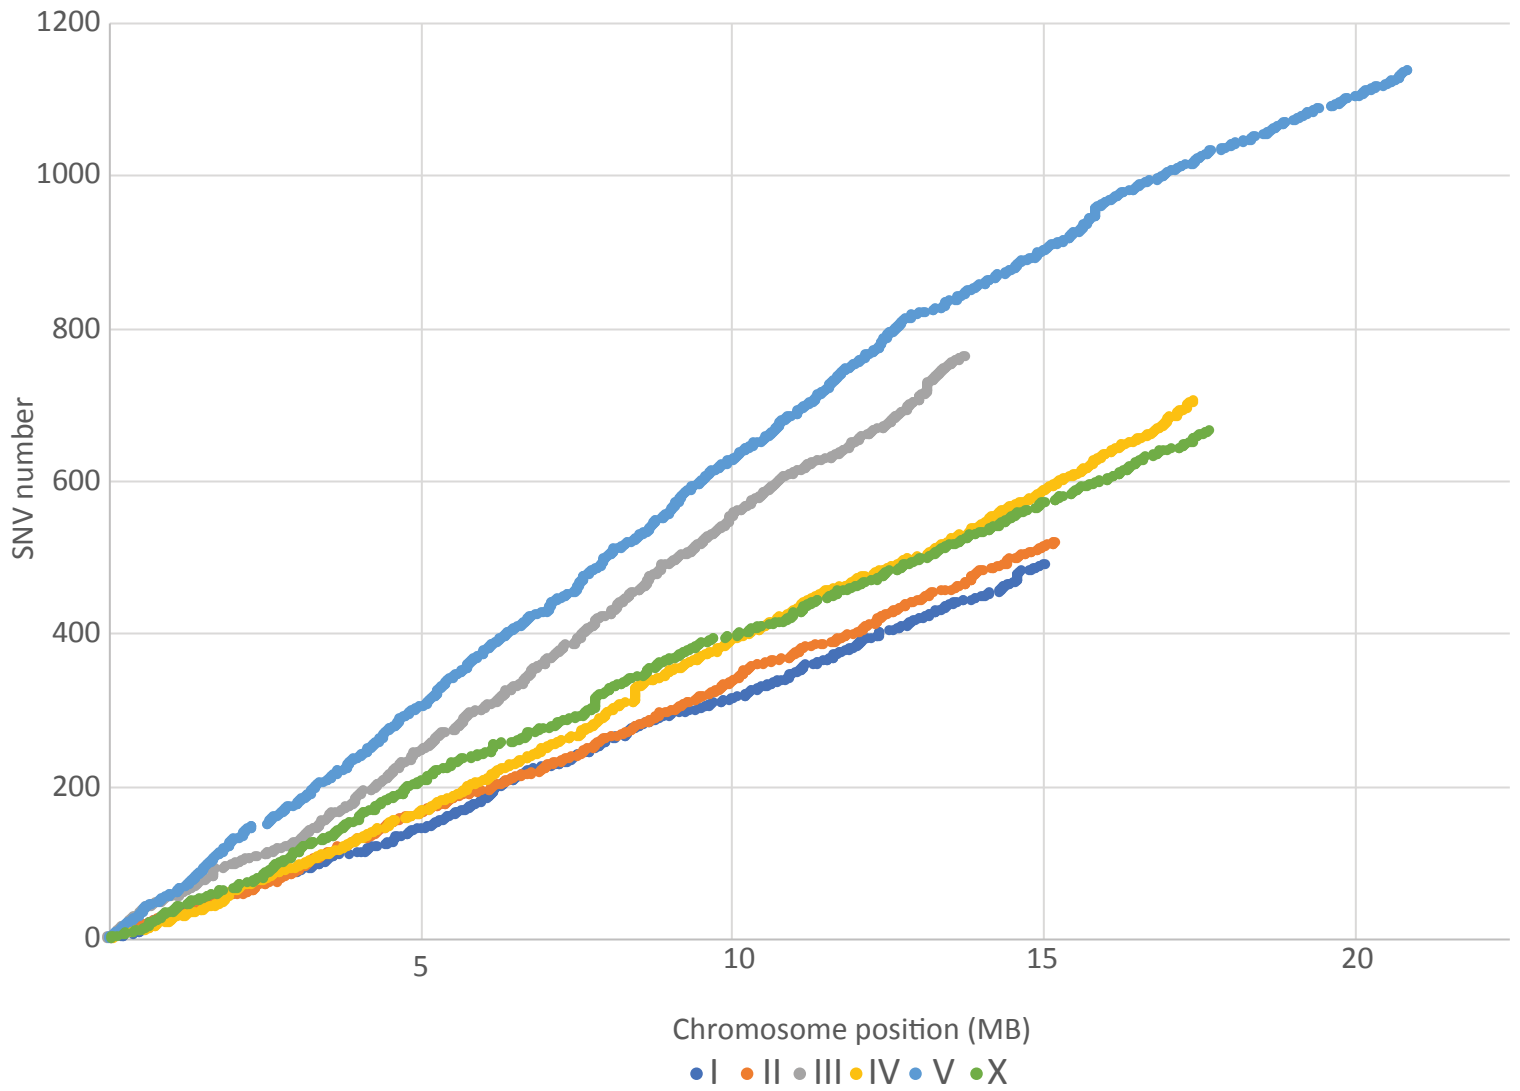

Figure S3. Distribution of CX-5461-induced SNVs across all six chromosomes. Note the higher frequency of on the balanced chromosomes III and V.
